1                                   **Highly-Neutralizing COVID-19-Convalescent-Plasmas Potently Block**  
2                                   **SARS-CoV-2 Replication and Pneumonia in Syrian Hamsters**

3  
4           Yuki Takamatsu<sup>1</sup>, Masaki Imai<sup>2</sup>, Kenji Maeda<sup>1</sup>, Noriko Nakajima<sup>3</sup>, Nobuyo Higashi-Kuwata<sup>1</sup>, Kiyoko  
5           Iwatsuki-Horimoto<sup>2</sup>, Mutsumi Ito<sup>2</sup>, Maki Kiso<sup>2</sup>, Tadashi Maemura<sup>2</sup>, Yuichiro Takeda<sup>4</sup>, Kazumi Omata<sup>5,6</sup>,  
6           Tadaki Suzuki<sup>3</sup>, Yoshihiro Kawaoka<sup>2,7,8</sup>, and Hiroaki Mitsuya<sup>1,9,10</sup>

7  
8  
9           <sup>1</sup>Department of Refractory Viral Infections, National Center for Global Health and Medicine Research  
10           Institute; <sup>2</sup>Division of Virology, Department of Microbiology and Immunology, Institute of Medical  
11           Science, University of Tokyo; <sup>3</sup>Department of Pathology, National Institute of Infectious Diseases;  
12           <sup>4</sup>Department of Respiratory Medicine, Center Hospital of the National Center for Global Health and  
13           Medicine; <sup>5</sup>Center for Clinical Sciences, National Center for Global Health and Medicine; <sup>6</sup>Departments  
14           of Hematology, Rheumatology, and Infectious Diseases, Kumamoto University Hospital; <sup>7</sup>Influenza  
15           Research Institute, Department of Pathobiological Sciences, School of Veterinary Medicine, University of  
16           Wisconsin-Madison; <sup>8</sup>Department of Special Pathogens, International Research Center for Infectious  
17           Diseases, Institute of Medical Science, University of Tokyo; <sup>9</sup>Experimental Retrovirology Section, Center  
18           for Cancer Research, National Cancer Institute, National Institutes of Health; <sup>10</sup>Department of Clinical  
19           Sciences, Kumamoto University School of Medicine

20  
21                                   *Running Title: Convalescent Plasma Blocks SARS-CoV-2 in Hamsters*  
22                                   *(49/50 characters, including space)*

23  
24                                   \*Correspondence should be addressed to H.M.

25  
26                                   Postal address: Hiroaki Mitsuya, M.D., Ph.D.  
27                                   1-21-1 Toyama, Shinjuku, Tokyo, 162-8655, Japan  
28                                   Phone: +81-3-3202-7181  
29                                   E-mail: [hmitsuya@hosp.ncgm.go.jp](mailto:hmitsuya@hosp.ncgm.go.jp)

30 **ABSTRACT**

31 Despite various attempts to treat SARS-CoV-2-infected patients with COVID-19-convalescent plasmas,  
32 neither appropriate approach nor clinical utility has been established. We examined the efficacy of  
33 administration of highly-neutralizing COVID-19-convalescent plasma (*hn*-plasmas) and such  
34 plasma-derived IgG administration using the Syrian hamster COVID-19 model. Two *hn*-plasmas, which  
35 were in the best 1% of 340 neutralizing-activity-determined convalescent plasma samples, were  
36 intraperitoneally administered to SARS-CoV-2-infected hamsters, resulting in significant reduction of viral  
37 titers in lungs by up to 32-fold as compared to the viral titers in hamsters receiving control non-neutralizing  
38 plasma, while with two moderately neutralizing plasmas (*mn*-plasmas) administered, viral titer reduction  
39 was by up to 6-fold. IgG fractions purified from the two *hn*-plasmas also reduced viral titers in lungs than  
40 those from the two *mn*-plasmas. The severity of lung lesions seen in hamsters receiving *hn*-plasmas was  
41 minimal to moderate as assessed using micro-computerized tomography, which histological examination  
42 confirmed. Western blotting revealed that all four COVID-19-convalescent-plasmas variably contained  
43 antibodies against SARS-CoV-2 components including the receptor-binding domain and S1 domain. The  
44 present data strongly suggest that administering potent-neutralizing-activity-confirmed  
45 COVID-19-convalescent plasmas would be efficacious in treating patients with COVID-19.  
46

47

48 **KEY WORDS**

49 COVID-19, SARS-CoV-2, Convalescent plasma therapy, Syrian hamster COVID-19 model  
50

51

52 **Importance**

53 Convalescent plasmas obtained from patients, who recovered from a specific infection, have been used as  
54 agents to treat other patients infected with the very pathogen. To treat using convalescent plasmas, despite  
55 that more than 10 randomized-controlled-clinical-trials have been conducted and more than 100 studies  
56 are currently ongoing, the effects of convalescent plasma against COVID-19 remained uncertain. On the  
57 other hand, certain COVID-19 vaccines have been shown to reduce the clinical COVID-19 onset by  
58 94-95%, for which the elicited SARS-CoV-2-neutralizing antibodies are apparently directly responsible.  
59 Here, we demonstrate that highly-neutralizing-effect-confirmed convalescent plasmas significantly reduce  
60 the viral titers in the lung of SARS-CoV-2-infected Syrian hamsters and block the development of  
61 virally-induced lung lesions. The present data provide a proof-of-concept that the presence of  
62 highly-neutralizing antibody in COVID-19-convalescent plasmas is directly responsible for the reduction  
63 of viral replication and support the use of highly-neutralizing antibody-containing plasmas in COVID-19  
64 therapy with convalescent plasmas.  
65

## 66 Introduction

67 More than a year had passed since the World Health Organization (WHO) declared a state of  
68 emergency, the pandemic of the novel coronavirus (severe acute respiratory syndrome coronavirus 2;  
69 SARS-CoV-2) disease (COVID-19) is still spreading worldwide<sup>1,2</sup>. More than 176 million people have  
70 been infected and more than 3.8 million lives have been lost by June 17, 2021 (<https://covid19.who.int/>)  
71 and COVID-19 is continuously posing most serious public health and socioeconomic problem globally in  
72 this century<sup>3</sup>. Vaccination is one of the most effective prophylactic health measures<sup>4,5</sup> and considered as one  
73 of the most promising key strategy for curbing the current pandemic<sup>6</sup>. Multiple COVID-19 vaccines, such  
74 as mRNA vaccines, BNT162b2<sup>7</sup>, mRNA-1273<sup>8</sup>, ChAdOx1 nCoV-19/AZD1222<sup>9</sup>, and an adenovirus vector,  
75 Ad26.COV2.S<sup>10</sup> are presently available in the US, the European Union, and other parts of the world.  
76 Different classes of vaccines such as a recombinant protein nanoparticle vaccine, NVX-CoV2373<sup>11</sup>, and  
77 inactivated COVID-19 vaccines, BBIBP-CorV<sup>12</sup>, CoronaVac<sup>13</sup>, and Covaxin<sup>14</sup> are currently under  
78 development. Yet, how long the observed efficacy of vaccines lasts and whether such vaccines are effective  
79 in treating already-infected individuals remain to be determined<sup>15</sup>. In addition, the spread of SARS-CoV-2  
80 variants which resist to the efficacy of certain vaccines throughout the world has been of great concern<sup>16,17</sup>.

81 Moreover, in terms of disease management, remdesivir<sup>18</sup>, dexamethasone<sup>19</sup>, baricitinib<sup>20</sup>, and IL-6  
82 pathway inhibitors (e.g., tocilizumab)<sup>21</sup> are the only recommended agents for severely ill patients with  
83 COVID-19, although the efficacy of such agents is only limited<sup>22,23</sup> and no COVID-specific therapeutics  
84 are likely to be available in the immediate future. In this regard, immunotherapies for certain cancers and  
85 autoimmune disorders are relatively well established<sup>24</sup>; however, there are only a few immunotherapy for  
86 infectious diseases, which were shown to be efficacious. The efficacy of plasma infusions of  
87 SARS-CoV-1-convalescent plasma is controversial mainly because most clinical trials were not controlled  
88 or randomized<sup>25</sup>. Moreover, in many clinical trials, plasmas administered were not examined for their titers  
89 of neutralizing antibodies contained. Of note, fatality/clinical outcomes among those with COVID-19  
90 receiving convalescent plasma whose titers of anti-SARS-CoV-2-receptor binding domain (RBD)  
91 antibodies have been reportedly lower than in those receiving no plasma<sup>26,27</sup>, especially when such plasmas  
92 were administered early after the onset. The outcomes of those receiving high-titer anti-SARS-CoV-2-RBD  
93 or anti-SARS-CoV-2-spike antibodies early after the onset have also been shown to be favorable<sup>27</sup>.

94 Imai and his colleagues have recently reported that SARS-CoV-2 efficiently replicates in the lungs of  
95 Syrian hamsters and causes severe pathological lung lesions that share the characteristics with lung lesions  
96 in patients with COVID-19<sup>28</sup>. Here, we examined the efficacy of neutralizing activity-confirmed  
97 COVID-19-convalescent plasmas and such plasma-derived IgG fractions by employing the  
98 SARS-CoV-2-exposed VeroE6 cells<sup>29</sup> and Syrian hamster model. The present data strongly suggest that the  
99 treatment of COVID-19 patients using highly neutralizing activity-confirmed convalescent plasmas would  
100 efficiently block the development of COVID-19-associated lung lesions.

101

102

## 103 Results

### 104 *COVID-19-convalescent-plasma-derived IgG fractions block SARS-CoV-2 infection in vitro.*

105 We have previously examined the presence and temporal changes of the neutralizing activity of IgG  
106 fractions from 43 COVID-19-convalescent plasma samples using cell-based assays<sup>30</sup>. In the current study,  
107 we chose two highly-neutralizing plasma (*hn*-plasma) samples and IgG fractions from Donor-043 (D43)  
108 and D84, which were in the best 1.4 and 0.5% of 340 neutralizing-activity-determined convalescent plasma  
109 samples, respectively, and two moderately-neutralizing plasma (*mn*-plasma) samples and IgG fractions  
110 from D73 and D91, which showed top 40.5 and 20.9% neutralizing activity in the 340 convalescent plasma  
111 samples, respectively, and confirmed their activity to block the cytopathic effect (CPE) of a SARS-CoV-2  
112 strain (SARS-CoV-2<sup>05-2N</sup>) using VeroE6<sup>TMPRSS2</sup> cells and the methyl thiazolyl tetrazolium (MTT)  
113 method<sup>29,30</sup>. Figure 1 shows that all the four representative COVID-19-convalescent plasmas and IgG  
114 samples significantly blocked the CPE of SARS-CoV-2<sup>05-2N</sup>. D43 and D84 plasmas were highly potent  
115 against the virus with IC<sub>50</sub> values of 1,400±240 and 1,100±60 fold, respectively, while D73 and D91

116 samples showed relatively moderate activity with IC<sub>50</sub> values of 220±30 and 400±90 fold, respectively  
117 (Figure 1a and Table 1). IgG fractions purified from D43 and D84 plasmas also exerted potent activity with  
118 IC<sub>50</sub> values of 9.2±1.3 and 9.8±2.7 µg/ml, respectively, while those from D73 and D91 showed moderate  
119 activity with IC<sub>50</sub> values of 47.9±9.0 and 24.9±3.1 µg/ml, respectively (Figure 1b and Table 1). A plasma  
120 sample from a healthy and qRNA-PCR-and-ELISA-confirmed SARS-CoV-2-uninfected individual and its  
121 IgG fraction failed to show significant CPE-blocking activity (Figure 1 and Table 1). We have also  
122 quantified the amounts of SARS-CoV-2-S1-binding antibodies in each plasma sample by using D84  
123 plasma as a reference (100%) employing a commercially available ELISA kit. D43, D73, and D91  
124 contained 140, 34, and 57% of IgG relative to D84 plasma (Table 1), showing that the amounts of  
125 S1-binding antibodies contained in plasma samples were roughly proportionate to the blocking effects of  
126 each plasma and IgG fraction, although it is of note that the presence of greater amounts of S1-binding  
127 antibodies in plasma does not necessarily predict the presence of greater levels of neutralizing activity<sup>30</sup>.  
128 Taken together, these data show that all the plasma samples used were highly or moderately active in  
129 blocking the infectivity and replication of SARS-CoV-2 and that the IgG fractions isolated from plasmas  
130 were largely responsible for the activity of plasmas to block the infectivity and CPE of the virus.

131  
132 ***Body weight gains in SARS-CoV-2<sup>UT-NCGM02</sup>-exposed and neutralizing plasma-receiving Syrian***  
133 ***hamsters were significantly greater than those in control-plasma-receiving animals.***

134 We have previously demonstrated that SARS-CoV-2 isolates efficiently replicate in the lungs of  
135 Syrian hamsters, causing severe pathological lung lesions<sup>28</sup>. Such SARS-CoV-2-infected 7- to  
136 8-month-old hamsters also underwent substantial weight loss by day 7 post-infection and continued to  
137 lose weight for up to 14 days post-infection<sup>28</sup>. In the present study, we employed 1-month-old hamsters  
138 and intranasally inoculated them with 10<sup>3</sup> plaque-forming units (PFU) of a clinically isolated  
139 SARS-CoV-2, SARS-CoV-2<sup>UT-NCGM02</sup> (Set as Day 0). In 24 hours following the inoculation (on day 1),  
140 three hamsters per group were intraperitoneally administered with 2 ml of plasma from a  
141 qRNA-PCR-and-ELISA-confirmed SARS-CoV-2-uninfected healthy individual (control-plasma; See the  
142 protocol in Supp Figure 1). As the body weights of the control-plasma-receiving hamsters (n=3) were  
143 followed up every day, their weights continued to decrease by day 8 following the viral exposure, while  
144 the weights started to gain by day 9 and continued to gain thereafter. However, in hamsters that received  
145 the *hn*-plasma samples (D43 and D84), the decrease in body weights by day 8 was much less than in  
146 control-plasma-receiving hamsters and their body weights started to increase on day 9 and beyond (*p*  
147 values of the temporal changes in the body weights for the D43- and D84-receiving hamster groups to the  
148 control group were 0.0095 and 0.0092, respectively). One of the D73-plasma-receiving hamsters  
149 (Hamster#28) had a significantly greater body weight decrease among the four D73-plasma-receiving  
150 hamsters and the average body weights became close to those in the control-plasma-receiving hamsters  
151 (Figure 2; *p* value for the D73-plasma-receiving hamsters compared to four control-plasma-receiving  
152 hamsters was 0.2025).

153  
154 ***SARS-CoV-2<sup>UT-NCGM02</sup>-exposed and neutralizing plasma-receiving Syrian hamsters develop less severe***  
155 ***pneumonia.***

156 SARS-CoV-2-infected Syrian hamsters undergo lung injuries, which share characteristics with injuries  
157 seen in the lungs of SARS-CoV-2-infected individuals, including severe, bilateral, largely peripherally  
158 distributed, multi-lobular ground glass opacity lesions and lobular consolidations as examined using  
159 microcomputed tomographic (micro-CT) imaging (Figure 3)<sup>28</sup>. In order to examine the effects of  
160 administering neutralizing human plasmas on the development of SARS-CoV-2-induced lung lesions in  
161 virus-exposed Syrian hamsters, we employed the *in vivo* X-ray micro-CT image capturing in the present  
162 study. In all three SARS-CoV-2<sup>UT-NCGM02</sup>-exposed hamsters, which intraperitoneally received 2 ml of the  
163 control-plasma on day 1 post-infection (Hamsters#21, #22, and #23), low-level infiltration with  
164 ground-glass opacities (GGOs) in bilateral lower lobes appeared by day 4 in both coronal and axial  
165 micro-CT thorax images (Supp Figure 2). By day 6, those lesions evolved into a mixed pattern of GGOs,

166 consolidations, and interlobular septal thickening seen in whole lung. By day 8, such lesions further  
167 worsened to show GGOs with consolidations and fibrous stripes in bilateral lung accompanied with  
168 mediastinal emphysema, traction bronchiectasis, interlobular septal thickening, and/or cavitations (Supp  
169 Figure 2). Micro-CT scans taken on day 10, however, showed healing of the lung cavitation and mediastinal  
170 emphysema together with reduced GGOs. Micro-CT scans on day 12 show further healing of the  
171 consolidation and GGOs, while multiple focal fibrous stripes remained in bilateral peripheral field (Supp  
172 Figure 2).

173 However, in all three hamsters that intraperitoneally received either of the two *hn*-plasma samples  
174 (Hamsters#24, #25, and #26 received 2 ml of D43 plasma; while Hamsters #30, #31 and #32 received 2 ml  
175 D84 plasma), no such extensive lung lesions developed throughout the 12-day period of observation and  
176 the difference between the lung images of D43- and D84-plasma-receiving hamsters and those of  
177 control-plasma-receiving Hamsters#21, #22, and #23 on day 8 post-infection (the dorsal lung images of  
178 control-plasma-receiving hamsters were taken from Supp Figure 2) was readily noticeable.

179 The lung CT scan images of *mn*-plasma-receiving hamsters (Hamsters#27, #28, and #29 received D73  
180 plasma; while Hamsters #33, #34 and #35 received D91 plasma) showed mixed but moderate GGO lesions  
181 and interlobular septal thickening in whole lung, however, no mediastinal emphysema or traction  
182 bronchiectasis were observed except in Hamster#28 (Figure 3a). Coronal micro-CT scan images confirmed  
183 the moderate changes in the lung scan images of those hamsters as compared to the lung CT images of the  
184 control-plasma-receiving hamsters (Figure 3b).

185

186 ***D43-plasma administration apparently inhibited the spread of viral infection from bronchiolar to***  
187 ***alveolar regions.***

188 On day 4 post-infection (on day 3 post-plasma-administration), histopathological features and virus  
189 distribution pattern in the lung tissues of each hamster were examined. All histopathology and  
190 immunohistochemistry features obtained are illustrated in Supp Figure 3. Histopathology of the lung  
191 sections of each animal showed moderate inflammatory cell infiltration consisting of neutrophil,  
192 monocytes/macrophages, and lymphocytes around the bronchi and bronchioles. In some regions, the  
193 inflammatory cells were detected in the alveoli. However, the degrees of histopathological changes  
194 substantially varied among hamsters, and there was no readily significant difference among the groups  
195 administered with different plasmas (Figure 4, panels a, c, e, g, i, and Supp Figures 3a–e). Then,  
196 immunohistochemistry with anti-SARS-CoV-2 antibody revealed viral antigens in the bronchiole  
197 epithelium and viral spreading to the alveolar epithelium surrounding the bronchioles in all the animals  
198 except for D43-plasma-receiving hamsters. Notably, in the D43-receiving animals (Figure 4d and Supp  
199 Figure 3b), substantially less viral antigens were seen and the extent of the viral spreading was apparently  
200 limited to bronchial and alveolar epitheliums adjacent to bronchioles regardless of the degrees of  
201 histopathological changes compared to the amounts of viral antigens seen in the lungs of control-plasma-,  
202 and D73-, D84-, and D91-plasma-receiving hamsters (Figure 4b, f, h, j, and Supp Figures 3a, c, and d).  
203 Moreover, the numbers of viral antigen-positive-cells in the alveolar regions also appeared less in the lung  
204 of D43-plasma-receiving hamsters (Figure 4d and Supp Figure 3b) than in the control-plasma-receiving  
205 and D73-, D84-, or D91-plasma-receiving animals (Figure 4b, f, h, j, and Supp Figures 3a, c, and d).

206

207 ***Neutralizing activity-confirmed plasmas significantly suppressed the replication of SARS-CoV-2 in the***  
208 ***lung of hamsters.***

209 All the neutralizing activity-confirmed COVID-19-convalescent plasma samples (D43, D73, D84, and  
210 D91 plasmas) mitigated the body weight reduction and SARS-CoV-2-induced lung lesions (Figure 2, Supp  
211 Figure 2, and Figure 3); however, the histopathological examination and immunostaining method largely  
212 failed to detect differences in the presence or spread of the virus between the hamsters receiving the  
213 control-plasma and those receiving neutralizing-activity-confirmed plasmas (Figure 4 and Supp Figure 3).  
214 Thus, we attempted to quantify the amounts of infectious virions in the lungs of hamsters receiving  
215 control-plasma, D43-, D73-, D84-, or D91-plasma samples. Each hamster was exposed to the virus on day

216 0, intraperitoneally administered with 2 ml of each plasma on day 1, and sacrificed on day 4. Thereafter,  
217 each lung was homogenized and the virus titers in the homogenates were determined employing plaque  
218 forming assays using VeroE6<sup>TM</sup>PRSS2 cells. As shown in Figure 5a, the geometric mean titer for the hamsters  
219 receiving control-plasma was  $10^{8.5}$  PFU/g, while the administration of D43 and D91 plasmas had  
220 significantly suppressed the replication of SARS-CoV-2<sup>UT-NCGM02</sup> with viral titers of down to  $10^{7.0}$   
221 ( $p=0.0003$ ) and  $10^{7.7}$  ( $p=0.037$ ) PFU/g, respectively, while the reductions by D73 and D84 plasmas were  
222 not statistically significant ( $p>0.05$ ; Figure 5a). When IgG fractions isolated from plasmas were  
223 intraperitoneally administered to hamsters, D43 IgG fraction gave the greatest reduction with a geometric  
224 mean infectious viral titer of  $10^{7.1}$  PFU/g compared to the viral titer in the control-plasma-receiving  
225 hamsters with a geometric mean titer of  $10^{8.4}$  PFU/g; while D91, D84, and D73 IgG fractions gave mean  
226 titers of  $10^{7.7}$  ( $p=0.015$ ),  $10^{7.8}$  ( $p=0.037$ ), and  $10^{8.0}$  ( $p>0.05$ ) PFU/g, respectively (Figure 5b).

227 In an attempt to see the effects of administering IgG fractions isolated from neutralizing human  
228 plasmas on the development of lung lesions in virus-exposed animals, we conducted additional  
229 histopathological and immunostaining study. Since we had failed identifying the difference in the  
230 histopathological findings among lungs of hamsters receiving various plasmas, we examined the lung in  
231 one hamster, which had the lowest infectious viral titer among each group ( $n=4$ ) in this additional study.  
232 Representative images of the immunostained lung sections of hamsters showed that the infected cells are  
233 observed from the terminal bronchioles into the alveolar region in animals treated with control-plasma IgG,  
234 IgG from D73, D84, and D91 plasmas; however, the number of infected cells was much less in the terminal  
235 bronchioles and alveolar regions in the hamster receiving IgG fraction from D43 plasma (Supp Fig 4),  
236 corroborating the histopathological and immunostaining observations in hamsters receiving plasmas  
237 (Figure 4).

238

#### 239 ***COVID-19-convalescent-plasmas variably contain antibodies that specifically bind to viral components.***

240 We finally attempted to determine which antibodies within the four convalescent D43, D73, D84, and  
241 D91 plasma samples bind to SARS-CoV-2 components using the Jess capillary-based Western blot system.  
242 The four viral components (RBD, S1, S2, and nucleocapsid) are covalently fixed to the capillary and the  
243 presence of human IgG specifically bound to each viral component in the capillary is detected by exposing  
244 the capillary to HRP-conjugated anti-human IgG and iridescent light elicited by luminol being mediated by  
245 HRP. Figure 6a illustrates that each of the plasma contained IgG antibodies reactive with viral components,  
246 showing that the amounts and the ratios of each viral component-specific antibodies were substantially  
247 varied. Among the four convalescent plasma tested, D43, one of the two *hn*-plasmas contained the highest  
248 amounts of anti-RBD, -S1, and -NC IgG, while D84 contained the highest amount of anti-S2 and -whole  
249 Spike IgG (Figure 6b). Interestingly, the two *mn*-plasmas contained low levels of anti-RBD, -S1, -whole  
250 spike and -NC IgG.

251

252

#### 253 **DISCUSSION**

254 In the present study, we demonstrate that highly neutralizing COVID-19-convalescent plasmas  
255 (*hn*-plasmas) reduced the severity of lung lesions in SARS-CoV-2-exposed Syrian hamsters compared to  
256 those receiving a non-neutralizing (control) plasma or moderately-neutralizing plasmas (*mn*-plasmas) as  
257 assessed with microCT-captured images (Supp Figure 2 and Figure 3) and the presence of  
258 SARS-CoV-2-infected cells in the lung (Figure 4 and Supp Figures 3 and 4). Moreover, *hn*-plasmas  
259 induced significant reduction of viral titers in the lungs of SARS-CoV-2-exposed Syrian hamsters as  
260 compared to those receiving control plasma or *mn*-plasmas (Figure 5a). IgG fractions purified from  
261 *hn*-plasmas also substantially reduced viral titers in the lungs of hamsters (Figure 5b). These data strongly  
262 suggest that administering *hn*-COVID-19-convalescent plasmas would be efficacious in treating patients  
263 with COVID-19 and *mn*-plasmas are unlikely to be effective in treating COVID-19 patients. The data also  
264 suggest that the IgG fractions largely contribute to the antiviral activity of *hn*-plasma, although other

265 immune responses such as CD8<sup>+</sup> killer T-cell and Fc-effector functions may contribute to protection and  
266 their relative importance in protection against COVID-19 is to be investigated<sup>33,34</sup>.

267 Several recent clinical studies suggest that neutralizing antibodies are generally sufficient to confer  
268 protection against the SARS-CoV-2 infection and that the protection against COVID-19 development is  
269 largely explained by SARS-CoV-2-neutralizing antibody responses, leaving less room for impact of T cells  
270 on correlation.

271 Yet, the efficacy of infusions of COVID-19-convalescent plasma has been controversial mainly  
272 because most clinical trials were not well controlled or randomized<sup>25</sup>. However, the failure of most  
273 COVID-19-convalescent plasma infusion studies to prove to be efficacious is likely due to the facts that the  
274 plasmas used were not confirmed to contain high titers of neutralizing activity before transfusion. In fact, in  
275 a few studies, in which only convalescent plasma whose levels of anti-SARS-CoV-2-RBD antibodies were  
276 confirmed to be high, have produced favorable clinical results<sup>26,27</sup>.

277 It is noteworthy that even in the well-planned clinical studies where high titers of neutralizing  
278 antibodies were used, a number of such clinical studies employed different ways and means to express  
279 neutralizing activity such as 50% neutralization titers, reciprocal neutralizing antibody titers, and IC<sub>50</sub> log<sub>10</sub>  
280 geometric mean titers. Moreover, such clinical studies have used different cells and viral strains in  
281 quantifying neutralizing activity of plasmas. Thus, establishing “international unit” or “international  
282 standard” is being thought to be needed to compare across various studies and to calibrate the strength of  
283 neutralization with a reference human convalescent sera panel. Establishing such standard should improve  
284 the correlation between the levels of neutralization activity and resulting clinical efficacy<sup>35</sup>.

285 In our previous study<sup>30</sup>, to possibly calibrate the neutralizing activity of COVID-19-convalescent  
286 plasmas with the neutralizing activity of plasmas determined in other studies, we used neutralizing unit per  
287 mg protein of IgG derived from such COVID-19-convalescent plasmas. In the present study, from among  
288 340 COVID-19-convalescent plasma samples we have examined for their neutralizing activity using  
289 SARS-CoV-2<sup>05-2N</sup> that was isolated in Tokyo in March 2020 and TMPRSS2-overexpressing VeroE6  
290 (VeroE6<sup>TMPPRSS2</sup>) cells as target cells as previously described<sup>30</sup>, we chose four plasma samples as references  
291 of SARS-CoV-2-neutralizing plasmas. The four plasma samples, D43, D73, D84, and D91 were in the top  
292 1.4%, 40.5%, 0.5%, and 20.9% of 340 COVID-19-convalescent plasma samples, respectively. It is of note  
293 that approximately 60% of convalescent plasmas have low or no significant neutralizing activity as we  
294 mentioned in our previous report<sup>30</sup>. The reason why D43 was most effectively blocked the infection and  
295 replication of the virus in hamsters, while the comparably neutralizing D84 was less effectively blocked the  
296 virus in hamsters, remains to be elucidated. One possibility is that convalescent plasmas contain polyclonal  
297 neutralizing antibodies and their constituents may substantially vary from one convalescent patient to  
298 another<sup>36,37</sup>. Thus, even if a plasma sample exerts potent neutralizing activity in a cell-based assay, its  
299 neutralizing activity may not be directly well reproduced in the bodies of hamsters where the virus may  
300 unevenly infect and replicate so that the efficacy may vary depending on the constituent of polyclonal  
301 neutralizing antibodies.

302 One limitation of the current study is that only one SARS-CoV-2 strain (SARS-CoV-2<sup>05-2N</sup>) was  
303 employed and the results obtained here may not predict the efficacy in individuals infected with other  
304 SARS-CoV-2 strains, in particular, SARS-CoV-2 variants recently isolated<sup>38-41</sup>, which may escape  
305 neutralizing antibodies in plasmas used in the present study<sup>42</sup> or may replicate more efficiently than  
306 previously isolated SARS-CoV-2 strains such as SARS-CoV-2<sup>05-2N</sup><sup>43</sup>. However, if convalescent plasmas  
307 are collected from individuals who are infected with certain SARS-CoV-2 variants, the plasmas from such  
308 individuals should be of use to immediately treat others infected with the same variants.

309 In conclusion, the present data strongly suggest that administering highly-neutralizing  
310 COVID-19-convalescent plasmas should be efficacious in treating patients with COVID-19, but potent  
311 neutralizing activity has to be confirmed before administering such convalescent plasmas.

312

313

314 **MATERIALS AND METHODS**

315 **Patients.** Four patients, who were clinically diagnosed with COVID-19 and agreed to participate in the  
316 clinical studies (approval number NCGM-G-003472 and NCGM-G-003536) for convalescent plasma  
317 donation, were selected<sup>30</sup>. Donated plasma was stored at -20°C until use.  
318

319 **Cells, viruses, and IgG purification.** TMPRSS2-overexpressing VeroE6 (VeroE6<sup>TMPrSS2</sup>) cells (RRID:  
320 CVCL\_YQ49) were obtained from the Japanese Collection of Research Bioresources (JCRB) Cell Bank  
321 (Osaka, Japan). VeroE6<sup>TMPrSS2</sup> cells were maintained in Dulbecco's modified Eagle's medium (DMEM)  
322 supplemented with 10% fetal bovine serum, 100 µg/ml penicillin, 100 µg/ml kanamycin, and 1 mg/ml  
323 G418 under humidified atmosphere containing 5% CO<sub>2</sub> at 37°C. Two SARS-CoV-2 strains,  
324 hCoV-19/Japan/UT-NCGM02/2020 (SARS-CoV-2<sup>UT-NCGM02</sup>, GISAID Accession ID; EPI\_ISL\_418809)<sup>28</sup>  
325 and 05-2N (SARS-CoV-2<sup>05-2N</sup>)<sup>30</sup> were clinically isolated as previously described. IgG fractions were  
326 purified from convalescent plasma at Immuno-Biological Laboratories (Gunma, Japan) by using rProtein A  
327 Sepharose Fast Flow (Cytiva, Marlborough, MA) and eluted in phosphate-buffered saline (PBS). The IgG  
328 fractions were stored at -80°C until use.  
329

330 **Antiviral assays.** The SARS-CoV-2 neutralizing activity of donated plasma and purified IgG was  
331 determined as previously described<sup>29-31</sup>. In brief, VeroE6<sup>TMPrSS2</sup> cells were seeded in 96-well flat microtiter  
332 culture plates at the density of  $1 \times 10^4$  cells/well. On the following day, the virus (SARS-CoV-2<sup>05-2N</sup>) was  
333 mixed to the various concentrations of the plasma or purified IgG fractions and incubated for 20 min at  
334 37°C. The preincubated mixture was inoculated to the cells at a multiplicity of infection (MOI) of 0.01. The  
335 cells were cultured for 3 days and the number of viable cells in each well was measured using Cell Counting  
336 Kit-8 (Dojindo, Kumamoto, Japan). The potency of SARS-CoV-2 inhibition by plasma or purified IgG was  
337 determined based on its inhibitory effect on virally induced cytopathicity in VeroE6<sup>TMPrSS2</sup> cells. The  
338 amounts of SARS-CoV-2-S1-binding antibodies in each plasma sample were determined by using  
339 Anti-SARS-CoV-2 ELISA (IgG) (Euroimmun, Lübeck, Germany). The total human IgG concentration was  
340 determined by using Human IgG ELISA Kit (abcam, Cambridge, UK).  
341

342 **Experimental Infection of Syrian Hamsters.** All the animal infection experiments were conducted as  
343 previously described<sup>28</sup>. In brief, one-year-old male Syrian hamsters (Japan SLC Inc., Shizuoka, Japan) were  
344 enrolled. Hamsters were intranasally inoculated with  $10^3$  PFU (in 100 µl) of SARS-CoV-2<sup>UT-NCGM02</sup> under  
345 ketamine-xylazine anesthesia. On the following day, 2 ml of convalescent plasma (experiments 1 and 2) or  
346 purified IgG (experiment 3) were intraperitoneally (i.p.) transfused to each Syrian hamster (Supp. Figure 1).  
347 The total dosage and the dosage per body weight of human IgG in 2 ml plasma are shown in Supp. Table 1  
348 (Supp. Table 1). The total amount of human IgG in purified IgG fraction transfused to hamsters and plasma  
349 equivalent are shown in Supp. Table 2 (Supp. Table 2). The hamsters were monitored until the designated  
350 endpoint of the experiments.

351 For experiment 1, to monitor the body weight change and the micro-CT image, three hamsters per group  
352 were enrolled. The daily body weight was monitored for 15 days, and micro-CT imaging was conducted on  
353 days 0, 4, 6, 8, 10, and 12 post infection. The body weight was compared with the pre-infection baseline,  
354 and the relative values were calculated. The change in the body weights from the baseline of each hamster  
355 treated with plasma were compared and *p* value was calculated. In experiments 2 (plasma administered i.p.)  
356 and 3 (purified IgG fraction administered i.p.), in order to determine the *in vivo* antiviral activity of the  
357 convalescent plasma or purified IgG, four hamsters per group were enrolled. Hamsters were sacrificed on  
358 the fourth day post infection, and lungs were collected for histological examination and viral titration (Supp.  
359 Figure 1). The viral titer in the lungs was determined by means of plaque assays in VeroE6<sup>TMPrSS2</sup> cells. All  
360 experiments with hamsters were performed in accordance with the Science Council of Japan's Guidelines  
361 for Proper Conduct of Animal Experiments. The protocol was approved by the Animal Experiment  
362 Committee of the Institute of Medical Science, the University of Tokyo (approval number PA19-75).  
363



364 **Micro-CT imaging.** The chest CT images of the SARS-CoV-2-infected hamsters were captured as  
365 previously described using an *in vivo* micro-CT scanner (CosmoScan FX; Rigaku Corporation, Japan) until  
366 12 days post-infection under ketamine-xylazine anesthesia. The imaging was conducted at the following  
367 conditions; 2 min at 90 kV, 88  $\mu$ A, FOV 45 mm, and pixel size 90.0  $\mu$ m. After scanning, the lung images  
368 were reconstructed by using the CosmoScan Database software (Rigaku Corporation) and analyzed as  
369 manufacturer's instruction.

370  
371 **Pathological examination.** Excised animal tissues were fixed in 10%-buffered formalin and processed for  
372 paraffin embedding. The paraffin blocks were cut into 3- $\mu$ m-thick sections and then mounted on  
373 silane-coated glass slides. One section from each tissue sample was stained using a standard hematoxylin  
374 and eosin procedure; another was processed for immunohistochemistry. After deparaffinization, antigens  
375 were activated (121°C, 10 min) with Target Retrieval Solution pH6.0 (Dako Cytomation, Glostrup,  
376 Denmark), and endogenous HRP was inactivated by hydroperoxide treatment. The sections were treated  
377 with 5 % normal goat serum for 30 minutes at room temperature and incubated with rabbit monoclonal anti  
378 SARS-CoV nucleoprotein antibody (Sino Biological, Beijing, China) at 4°C overnight. Specific  
379 antigen-antibody reactions were visualized by means of 3,3'-diaminobenzidine tetrahydrochloride staining  
380 using the Dako Envision system (Dako Cytomation).

381  
382 **Detection and quantification of anti-SARS-CoV-2 IgG bound to viral components.** The amounts of  
383 anti-SARS-CoV-2 IgG antibodies reactive with SARS-CoV-2 viral components in convalescent plasma  
384 were determined using the Simple Western Jess apparatus and the SARS-CoV-2 Multi-Antigen Serology  
385 Module (Protein Simple, San Jose, CA) according to the manufacturer's instructions. In brief, various  
386 recombinant viral components [RBD (200  $\mu$ g/ml), nucleocapsid [NC](5  $\mu$ g/ml), S1(20  $\mu$ g/ml), S2(20  
387  $\mu$ g/ml), and whole Spike (20  $\mu$ g/ml)] were covalently fixed with ultraviolet irradiation to a 12-230 kDa Jess  
388 & Wes Separation Module (Protein Simple). The immobilized viral components were then exposed to each  
389 of 30-fold-diluted convalescent plasma samples (primary antibodies). Subsequently, the antibodies bound  
390 to the viral components were probed with horseradish peroxidase (HRP)-conjugated anti-human IgG  
391 (secondary antibody). The presence of human IgG in the Module is detected by iridescent light produced by  
392 luminol reagent being mediated by HRP. The quantification of each signal was performed using Compass  
393 for SW software ver. 5.0.1 (Protein Simple).

394  
395 **Statistical analysis.** For the comparison of the temporal changes in body weights of hamsters receiving  
396 control and convalescent plasma (control, D43, D73, D84, and D91), the changes in the body weights  
397 relative to the body weight before viral exposure were modeled with quartic functions. This is because  
398 each curve has a minimum around the middle of the post infection days and high values at its both edges.  
399 Therefore, the number of parameters determined is five, and the function was fitted to the data by use of  
400 the nonlinear least squares method which was performed by the Levenberg-Marquardt algorithm. The F  
401 statistics for the comparisons of two curves of the body-weight changes were calculated and the *p* values  
402 were derived<sup>32</sup>. The distribution of the residuals was tested and found to be consistent with normality.  
403 Because of the nonlinearity of the model, the *p* values are only approximate. For the viral titer in lung,  
404 each the convalescent plasma receiving group was compared with the healthy donor plasma receiving  
405 group using Dunnett's test by using JMP Pro 15.0.0 (SAS Institute).

406  
407  
408 **Contributors**  
409 Conceptualization, Yuk.T, K.M., Y.K., and H.M.; Methodology, Yuk.T., M.I., K.M., N.N., Y.K., and  
410 H.M.; Formal Analysis, K.O.; Investigation, Yuk.T., M.I., K.M., N.N., N.H-K., K.I-H., M.I., M.K., T.M.,  
411 and Yui.T.; Data curation, Yuk.T., M.I., K.M., K.I-H, M.I., T.M.; Writing – Original Draft, Yuk.T. and  
412 H.M.; Writing-Review & Editing, M.I., N.N., N.H-K., Yui.T., K.O., T.S., and Y.K.; Supervision, T.S.,  
413 Y.K., and H.M.; Project Administration, H.M.; Funding Acquisition, K.M., Y.K. and H.M.

414

415

416 ***Declaration of Interests***

417 All authors declare that they do not have any competing interests related to this study.

418

419

420 ***Acknowledgments***

421 This work was supported in part by Japan Agency for Medical Research and Development (AMED)  
422 (grant numbers 20fk0108160 and 20fk0108502 to K.M.; JP19fk0108113, JP20nk0101612,  
423 JP19fm0108006, JP21wm0125002, JP20fk0108260 and JP20fk0108502 to Y.K.; and 20fk0108502,  
424 20fk0108257, and 20fk0108510 to H.M.); by MHLW Research on Emerging and Re-emerging Infectious  
425 Diseases and Immunization Program (grant number JPMH20HA1006 to K.M.); by a grant from National  
426 Center for Global Health and Medicine Research Institute (grant number 20A2003D to K.M.) ; by  
427 National Institutes of Allergy and Infectious Diseases (grant number HHSN272201400008C to Y.K.).  
428 These funding sources were not involved in study design, in the collection, analysis, and interpretation of  
429 data, in the writing of the report, and in the decision to submit the paper for publication. We are grateful  
430 to Dr. Miwa Tamura-Nakano and Ms. Chinatsu Oyama in the communal laboratory of NCGM Research  
431 Institute for their technical support. The authors also thank Ms. Mariko Kato for technical assistance.

432

433 **Figure Legends**

434 **Figure 1. Anti-viral activity of convalescent plasma and purified IgG.** VeroE6<sup>TM<sub>PRSS2</sub></sup> cells were  
435 exposed to SARS-CoV-2<sup>05-2N</sup> with or without various concentrations of diluted plasma (a) or purified IgG  
436 (b). Note that highly neutralizing plasma (*hn*-plasma), D43 and D84, were highly potent while moderately  
437 neutralizing plasma (*mn*-plasma), D73 and D91, were relatively moderate active against the virus. A  
438 plasma sample from a healthy and qRNA-PCR-and-ELISA-confirmed SARS-CoV-2-uninfected individual  
439 and its IgG fraction failed to show significant CPE-blocking activity.

440

441 **Figure 2. Body weight change in SARS-CoV-2 infected Syrian hamsters with plasma transfusion.**  
442 Syrian hamsters were intranasally inoculated with 10<sup>3</sup> PFU of clinically isolated SARS-CoV-2  
443 (SARS-CoV-2<sup>UT-NCGM02</sup>). In 24 hours following the inoculation, hamsters were intraperitoneally  
444 administered with 2 ml of convalescent plasma or a qRNA-PCR-and-ELISA-confirmed  
445 SARS-CoV-2-uninfected healthy individual-derived control plasma, and the body weight was monitored  
446 daily for 15 days. The mean relative value from the pre-viral exposure baseline and S.D. values are shown.  
447 All the hamsters lost their weight by day 8 following the viral exposure, while the weights started to gain by  
448 day 9 and continued to gain thereafter. *P* values of the body weight change in D43-, D73-, D84-, and  
449 D91-receiving hamster groups to the control group were 0.0095, 0.2025, 0.0092, and 0.01, respectively.

450

451 **Figure 3. Micro-CT imaging of the lungs of SARS-CoV-2-infected Syrian hamsters with**  
452 **convalescent plasma transfusion on 8 days post viral exposure.** (a) Coronal and (b) axial images of the  
453 thorax of hamsters receiving the SARS-CoV-2 inoculation and COVID-19-convalescent plasma i.p.  
454 transfusion. (a, b) The control plasma-receiving hamsters (Hamsters #21, #22, and #23) developed the  
455 ground-glass opacities (GGOs) with consolidations and fibrosis. However, in all three hamsters receiving  
456 *hn*-plasma (D43 for Hamsters #24, #25, and #26, and D84 for Hamsters #30, #31, and #32), no such lung  
457 abnormalities were observed throughout the 12 days micro-CT imaging in Hamster #24, #25, #30 and mild  
458 to moderate GGO and interlobular septal thickening were focally observed in #26, #31, #32. On the other  
459 hand, the chest CT images in *mn*-plasma receiving hamsters (D73 for Hamsters #27, #28, and #29, and D91  
460 for Hamsters #33, #34, and #35) showed mixed but moderate GGO lesions and interlobular septal  
461 thickening in whole lung, however, no mediastinal emphysema or traction bronchiectasis were observed  
462 except in Hamster #28.

463

464 **Figure 4. Pathological examination of the hamsters treated with plasma.** Representative images of  
465 histopathology and immunohistochemistry on the lung sections of hamsters treated with control or each  
466 plasma on Day 1 post-infection are shown. Hematoxylin Eosin (HE) staining of the lung sections obtained  
467 from the control (a) and plasma D43 (c), D73 (e), D84 (g), or D91 (i) treated animals.  
468 Immunohistochemistry (IHC) for SARS-CoV-2 antigen detection of the lung sections obtained from the  
469 control (b) and plasma D43 (d), D73 (f), D84 (h), or D91 (j) treated animals. Scale bar = 200µm.

470

471 **Figure 5. Neutralizing activity of convalescent plasma in the lungs of SARS-CoV-2 infected Syrian**  
472 **hamsters with plasma transfusion.** Syrian hamsters were intranasally inoculated with 10<sup>3</sup> PFU of  
473 clinically isolated SARS-CoV-2 (SARS-CoV-2<sup>UT-NCGM02</sup>). In 24 hours following the inoculation, hamsters  
474 were intraperitoneally administered with 2 ml of plasma (a) or plasma-derived purified IgG (b). Four  
475 Syrian hamsters per group were sacrificed on 4 days post viral exposure (3 days post plasma transfusion),  
476 and the virus titers in the lungs and neutralizing antibody titer in sera were determined by employing  
477 VeroE6<sup>TM<sub>PRSS2</sub></sup> cells. The geometric mean titer and S.D. values are shown.

478

479 **Figure 6. The characteristics of the anti-SARS-CoV-2 IgG in convalescent plasma against multiple**  
480 **viral components.** The anti-SARS-CoV-2 IgG in each COVID-19-convalescent plasma reactive against  
481 SARS-CoV-2 viral components (RBD, S1, S2, whole Spike, and nucleocapsid [NC]) was detected using  
482 the Simple Western Jess System. (a) Western blotting image obtained with the Jess System and the

483 immunoreactive signals for the presence of viral components bound by anti-SARS-CoV-2 IgG by using  
484 Simple Western Jess System. All four COVID-19-convalescent plasmas contained the  
485 SARS-CoV-2-specific IgG. **(b)** The quantification of IgG levels in four COVID-19-convalescent plasmas.  
486 D43 and D84 plasma samples had high amounts of anti-RBD IgG, while D73 and D91 had much less  
487 amounts of anti-RBD IgG. The same trend was seen in the amounts of anti-S1 and anti-whole Spike IgGs.  
488 On the other hand, D43 sample had lower amount of anti-S2 IgG than D84. D43 had a much higher amount  
489 of anti-NC IgG compared with D73, D84, and D91.  
490

491 **Supporting Figure Legends**

492 **Supp. Figure 1. Scheme of the Syrian Hamster experiments.** Hamsters were intranasally inoculated  
493 with  $10^3$  PFU (in 100  $\mu$ l) of SARS-CoV-2<sup>UT-NCGM02</sup> (Set as Day 0). In 24 hours, 2 ml of convalescent  
494 plasma (experiments 1 and 2) or purified IgG (experiment 3) was intraperitoneally (i.p.) transfused to  
495 each Syrian hamster. In experiment 1, micro-CT imaging and the body weight monitoring were  
496 conducted for 15 days. In experiments 2 and 3, hamsters were sacrificed on day 4 and the histological  
497 examination and viral titration of lungs were conducted. The distribution of anti-viral activity of the 340  
498 donated convalescent plasma samples and four convalescent plasma tested are indicated in violin plot.  
499

500

501 **Supp. Figure 2. Administration of IgG fraction purified from plasma D43 effectively blocks the**  
502 **replication and spread of SARS-CoV-2 infection in lung tissue.** Fixed/paraffin-embedded lung tissue  
503 sections were immuno-histologically stained with anti-SARS-CoV-2-nucleoprotein polyclonal antibodies  
504 (in brown) and examined under light microscopy. Nuclei were counterstained with Mayer's hematoxylin  
505 (in blue). Representative images of the immune-stained lung sections of hamsters receiving IgG fraction  
506 isolated from the control-plasma (a) and IgG fractions from D43 (b), D73 (c), D84 (d), and D91 (e)  
507 plasmas are shown. Each inset shows a higher magnification field of the rectangle area, showing the  
508 terminal bronchioles open into the alveolar region. Note that the infected cells are observed from the  
509 terminal bronchioles into the alveolar region in animals treated with control-plasma IgG, or IgG from  
510 D73, D84, or D91 plasmas, but the number of infected cells is much less in the terminal bronchioles and  
511 alveolar regions in hamsters receiving IgG from D43 plasma (b). Scale bars in magnified view denote 50  
512  $\mu$ m and those in the insets are 200  $\mu$ m.  
513

514 **Supp. Figure 3. Images captured in the pathological examination of the lung in hamsters treated**  
515 **with plasma.** Comprehensive images of the histopathology and immunohistochemistry on the lung  
516 sections of hamsters treated with control or each plasma on Day 1 post-infection are shown. Hematoxylin  
517 eosin (HE) staining of the lung sections obtained from the control plasma- (a), plasma D43- (b), plasma  
518 D73- (c), plasma D84- (d), or plasma D91- (e) receiving animals was done. Immunohistochemistry (IHC)  
519 for SARS-CoV-2 antigen detection of the lung sections was also conducted and shown in the right-handed  
520 side of each panel. The figures featured in Figure 4 are indicated with asterisk (\*). Scale bar = 200 $\mu$ m  
521

522 **Supp. Figure 4. Administration of IgG fraction purified from plasma D43 effectively blocks the**  
523 **replication and spread of SARS-CoV-2 infection in the lung tissue.** Fixed/paraffin-embedded lung  
524 tissue sections were immuno-histologically stained with anti-SARS-CoV-2-nucleoprotein polyclonal  
525 antibodies (in brown) and examined under light microscopy. Nuclei were counterstained with Mayer's  
526 hematoxylin (in blue). Representative images of the immuno-stained lung sections of hamsters receiving  
527 IgG fraction isolated from the control-plasma (a) and IgG fractions from D43 (b), D73 (c), D84 (d), and  
528 D91 (e) plasmas are shown. Each inset shows a higher magnification field of the rectangle area, showing  
529 the terminal bronchioles open into the alveolar region. Note that the infected cells are observed from the  
530 terminal bronchioles into the alveolar region in animals treated with control-plasma IgG, or IgG from D73,  
531 D84, or D91 plasmas, but the number of infected cells is much less in the terminal bronchioles and alveolar  
532 regions in hamsters receiving IgG from D43 plasma (b). Scale bars in magnified view denote 50  $\mu$ m and  
533 those in the insets are 200  $\mu$ m.  
534

535 **Table 1. The neutralizing activity of convalescent plasma and purified IgG.**

536 The neutralizing activity of COVID-19-convalescent plasmas and their IgG fractions were determined  
537 using MTT assay employing VeroE6<sup>TMPRSS2</sup> cells. The relative amounts of anti-SARS-CoV-2-S1 binding  
538 antibody were quantified using anti-SARS-CoV-2-S1 IgG ELISA with serially diluted D84 plasma samples  
539 for standardization. All the convalescent plasma and purified IgG showed various potency of neutralizing  
540 activity, while healthy donor plasma and its purified IgG were inert against SARS-CoV-2<sup>05-2N</sup>. Of note, D43  
541 derived plasma and purified IgG showed the most potent antiviral activity with the IC<sub>50</sub> values of 1,400 ±  
542 240-fold and 9.2 ± 1.3 µg/ml, respectively.  
543

|               | Plasma IC <sub>50</sub><br>(fold) | Purified IgG IC <sub>50</sub><br>(µg/ml) | Anti-S1-IgG<br>(%) |
|---------------|-----------------------------------|------------------------------------------|--------------------|
| D43           | 1,400 ± 240                       | 9.2 ± 1.3                                | 140                |
| D73           | 220 ± 30                          | 47.9 ± 9.0                               | 34                 |
| D84           | 1,100 ± 60                        | 9.8 ± 2.7                                | 100                |
| D91           | 400 ± 90                          | 24.9 ± 3.1                               | 57                 |
| Healthy donor | < 2                               | > 1,000                                  | < 0.3              |

544 **Supp. Table 1. The amount of total human IgG in plasma transfused to hamsters.**

545 Two ml of four COVID-19 convalescent plasma and one healthy donor plasma was intraperitoneally  
546 transfused to each Syrian hamster. The concentrations of total human IgG in D43, D73, D84, and D91  
547 plasma samples were 7.9 mg/ml, 6.2 mg/ml, 9.8 mg/ml, and 6.0 mg/ml, giving the total IgG administrated  
548 15.8 mg, 12.4 mg, 19.6 mg, and 12.0 mg, respectively. The dosage of total human IgG per body weight in  
549 D43, D73, D84, and D91 group ranged from 191.3 – 200.0 (mg/kg), 144.2 – 148.5 (mg/kg), 219.0 – 241.4  
550 (mg/kg), and 127.8 – 163.0 (mg/kg), respectively.  
551

| Group | Animal # | Total IgG in 2 ml plasma (mg) | Body weight (g) | IgG per body weight (mg/kg) |
|-------|----------|-------------------------------|-----------------|-----------------------------|
| D43   | 24       | 15.8                          | 79.3            | 199.2                       |
|       | 25       | 15.8                          | 79.0            | 200.0                       |
|       | 26       | 15.8                          | 82.6            | 191.3                       |
| D73   | 27       | 12.4                          | 86.0            | 144.2                       |
|       | 28       | 12.4                          | 83.5            | 148.5                       |
|       | 29       | 12.4                          | 85.1            | 145.7                       |
| D84   | 30       | 19.6                          | 81.2            | 241.4                       |
|       | 31       | 19.6                          | 89.5            | 219.0                       |
|       | 32       | 19.6                          | 81.5            | 240.5                       |
| D91   | 33       | 12.0                          | 73.6            | 163.0                       |
|       | 34       | 12.0                          | 93.9            | 127.8                       |
|       | 35       | 12.0                          | 82.7            | 145.1                       |

552 **Supp Table 2. The amount of total human IgG in purified IgG transfused hamsters.**

553 Two ml of four COVID-19-convalescent plasma samples and one healthy donor plasma-derived purified  
554 IgG was intraperitoneally transfused to each Syrian hamster. The amount of total IgG transfused in D43,  
555 D73, D84, and D91 group was 14.5 mg, 8.4 mg, 16.5 mg, and 9.4 mg, which was equivalent to 1.8 ml, 1.4  
556 ml, 1.7 ml, and 1.6 ml of the convalescent plasma, respectively.

557

| Group | Concentration of purified IgG (mg/ml) | Total IgG transfused (mg) | Equivalent amount of plasma (ml) |
|-------|---------------------------------------|---------------------------|----------------------------------|
| D43   | 7.2                                   | 14.5                      | 1.8                              |
| D73   | 4.2                                   | 8.4                       | 1.4                              |
| D84   | 8.2                                   | 16.5                      | 1.7                              |
| D91   | 4.7                                   | 9.4                       | 1.6                              |

558



559 **References**

560

561 1 Zhu N, Zhang D, Wang W, Li X, Yang B, Song J, Zhao X, Huang B, Shi W, Lu R, Niu P, Zhan F, Ma  
562 X, Wang D, Xu W, Wu G, Gao GF, Tan W, China Novel Coronavirus Investigating and Research  
563 Team. A Novel Coronavirus from Patients with Pneumonia in China, 2019. *N Engl J Med.* 2020; **382**,  
564 727–733.

565

566 2 Huang C, Wang Y, Li X, Ren L, Zhao J, Hu Y, Zhang L, Fan G, Xu J, Gu X, Cheng Z, Yu T, Xia J,  
567 Wei Y, Wu W, Xie X, Yin W, Li H, Liu M, Xiao Y, Gao H, Guo L, Xie J, Wang G, Jiang R, Gao Z, Jin  
568 Q, Wang J, Cao B. Clinical features of patients infected with 2019 novel coronavirus in Wuhan, China.  
569 *Lancet.* 2020; **395**, 497–506.

570

571 3 Mitsuya H, Kokudo N. Sustaining containment of COVID-19: global sharing for pandemic response.  
572 *Glob Health Med.* 2020; **2**,53–55.

573

574 4 Maciosek MV, LaFrance AB, Dehmer SP, McGree DA, Flottemesch TJ, Xu Z, Solberg LI. Updated  
575 Priorities Among Effective Clinical Preventive Services. *Ann Fam Med.* 2017; **15**, 14–22.

576

577 5 Whitney CG, Zhou F, Singleton J, Schuchat A, Centers for Disease Control and Prevention (CDC).  
578 Benefits from immunization during the vaccines for children program era - United States, 1994-2013.  
579 *MMWR Morb Mortal Wkly Rep.* 2014; **63**, 352–355.

580

581 6 Richman DD. COVID-19 vaccines: implementation, limitations and opportunities. *Glob Health Med.*  
582 2021; **3**,1–5.

583

584 7 Walsh EE, Frenck RW Jr, Falsey AR, Kitchin N, Absalon J, Gurtman A, Lockhart S, Neuzil K,  
585 Mulligan MJ, Bailey R, Swanson KA, Li P, Koury K, Kalina W, Cooper D, Fontes-Garfias C, Shi PY,  
586 TüreciÖ, Tompkins KR, Lyke KE, Raabe V, Dormitzer PR, Jansen KU,Şahin U, Gruber WC. Safety  
587 and Immunogenicity of Two RNA-Based Covid-19 Vaccine Candidates. *N Engl J Med.* 2020; **383**,  
588 2439–2450.

589

590 8 Jackson LA, Anderson EJ, Roupheal NG, Roberts PC, Makhene M, Coler RN, McCullough MP,  
591 Chappell JD, Denison MR, Stevens LJ, Pruijssers AJ, McDermott A, Flach B, Doria-Rose NA,  
592 Corbett KS, Morabito KM, O'Dell S, Schmidt SD, Swanson PA 2nd, Padilla M, Mascola JR, Neuzil  
593 KM, Bennett H, Sun W, Peters E, Makowski M, Albert J, Cross K, Buchanan W, Pikaart-Tautges R,  
594 Ledgerwood JE, Graham BS, Beigel JH, mRNA-1273 Study Group. An mRNA Vaccine against  
595 SARS-CoV-2 - Preliminary Report. *N Engl J Med.* 2020; **383**, 1920–1931.

596

597 9 Folegatti PM, Ewer KJ, Aley PK, Angus B, Becker S, Belij-Rammerstorfer S, Bellamy D, Bibi S,  
598 Bittaye M, Clutterbuck EA, Dold C, Faust SN, Finn A, Flaxman AL, Hallis B, Heath P, Jenkin D,  
599 Lazarus R, Makinson R, Minassian AM, Pollock KM, Ramasamy M, Robinson H, Snape M, Tarrant R,  
600 Voysey M, Green C, Douglas AD, Hill AVS, Lambe T, Gilbert SC, Pollard AJ, Oxford COVID  
601 Vaccine Trial Group. Safety and immunogenicity of the ChAdOx1 nCoV-19 vaccine against  
602 SARS-CoV-2: a preliminary report of a phase 1/2, single-blind, randomised controlled trial. *Lancet.*  
603 2020; **396**, 467–478.

604

605 10 Sadoff J, Le Gars M, Shukarev G, Heerwegh D, Truyers C, de Groot AM, Stoop J, Tete S, Van  
606 Damme W, Leroux-Roels I, Berghmans PJ, Kimmel M, Van Damme P, de Hoon J, Smith W,  
607 Stephenson KE, De Rosa SC, Cohen KW, McElrath MJ, Cormier E, Scheper G, Barouch DH,

- 608 Hendriks J, Struyf F, Douoguih M, Van Hoof J, Schuitemaker H. Interim Results of a Phase 1-2a Trial  
609 of Ad26.COV2.S Covid-19 Vaccine. *N Engl J Med.* 2021; **384**, 1824–1835.  
610
- 611 11 Keech C, Albert G, Cho I, Robertson A, Reed P, Neal S, Plested JS, Zhu M, Cloney-Clark S, Zhou H,  
612 Smith G, Patel N, Frieman MB, Haupt RE, Logue J, McGrath M, Weston S, Piedra PA, Desai C,  
613 Callahan K, Lewis M, Price-Abbott P, Formica N, Shinde V, Fries L, Lickliter JD, Griffin P,  
614 Wilkinson B, Glenn GM. Phase 1-2 Trial of a SARS-CoV-2 Recombinant Spike Protein Nanoparticle  
615 Vaccine. *N Engl J Med.* 2020; **383**, 2320–2332.  
616
- 617 12 Xia S, Duan K, Zhang Y, Zhao D, Zhang H, Xie Z, Li X, Peng C, Zhang Y, Zhang W, Yang Y, Chen  
618 W, Gao X, You W, Wang X, Wang Z, Shi Z, Wang Y, Yang X, Zhang L, Huang L, Wang Q, Lu J,  
619 Yang Y, Guo J, Zhou W, Wan X, Wu C, Wang W, Huang S, Du J, Meng Z, Pan A, Yuan Z, Shen S,  
620 Guo W, Yang X. Effect of an Inactivated Vaccine Against SARS-CoV-2 on Safety and  
621 Immunogenicity Outcomes: Interim Analysis of 2 Randomized Clinical Trials. *JAMA.* 2020; **324**,  
622 951–960.  
623
- 624 13 Zhang Y, Zeng G, Pan H, Li C, Hu Y, Chu K, Han W, Chen Z, Tang R, Yin W, Chen X, Hu Y, Liu  
625 X, Jiang C, Li J, Yang M, Song Y, Wang X, Gao Q, Zhu F. Safety, tolerability, and immunogenicity  
626 of an inactivated SARS-CoV-2 vaccine in healthy adults aged 18-59 years: a randomised,  
627 double-blind, placebo-controlled, phase 1/2 clinical trial. *Lancet Infect Dis.* 2021; **21**:181–192.  
628
- 629 14 Ella R, Vadrevu KM, Jogdand H, Prasad S, Reddy S, Sarangi V, Ganneru B, Sapkal G, Yadav P,  
630 Abraham P, Panda S, Gupta N, Reddy P, Verma S, Kumar Rai S, Singh C, Redkar SV, Gillurkar CS,  
631 Kushwaha JS, Mohapatra S, Rao V, Guleria R, Ella K, Bhargava B. Safety and immunogenicity of  
632 an inactivated SARS-CoV-2 vaccine, BBV152: a double-blind, randomised, phase 1 trial. *Lancet*  
633 *Infect Dis.* 2021; **21**:637–646.  
634
- 635 15 Richman DD. Antiviral Drug Discovery To Address the COVID-19 Pandemic. *mBio.* 2020; **11**,  
636 e02134-20.  
637
- 638 16 Davies NG, Abbott S, Barnard RC, Jarvis CI, Kucharski AJ, Munday JD, Pearson CAB, Russell TW,  
639 Tully DC, Washburne AD, Wenseleers T, Gimma A, Waites W, Wong KLM, van Zandvoort K,  
640 Silverman JD, CMMID COVID-19 Working Group, COVID-19 Genomics UK (COG-UK)  
641 Consortium, Diaz-Ordaz K, Keogh R, Eggo RM, Funk S, Jit M, Atkins KE, Edmunds WJ. Estimated  
642 transmissibility and impact of SARS-CoV-2 lineage B.1.1.7 in England. *Science.* 2021; **372**,  
643 eabg3055.  
644
- 645 17 Xie X, Liu Y, Liu J, Zhang X, Zou J, Fontes-Garfias CR, Xia H, Swanson KA, Cutler M, Cooper D,  
646 Menachery VD, Weaver SC, Dormitzer PR, Shi PY. Neutralization of SARS-CoV-2 spike 69/70  
647 deletion, E484K and N501Y variants by BNT162b2 vaccine-elicited sera. *Nat Med.* 2021; **27**, 620–  
648 621.  
649
- 650 18 Beigel JH, Tomashek KM, Dodd LE, Mehta AK, Zingman BS, Kalil AC, Hohmann E, Chu HY,  
651 Luetkemeyer A, Kline S, Lopez de Castilla D, Finberg RW, Dierberg K, Tapson V, Hsieh L, Patterson  
652 TF, Paredes R, Sweeney DA, Short WR, Touloumi G, Lye DC, Ohmagari N, Oh MD, Ruiz-Palacios  
653 GM, Benfield T, Fätkenheuer G, Kortepeter MG, Atmar RL, Creech CB, Lundgren J, Babiker AG,  
654 Pett S, Neaton JD, Burgess TH, Bonnett T, Green M, Makowski M, Osinusi A, Nayak S, Lane HC,  
655 ACTT-1 Study Group Members. Remdesivir for the Treatment of Covid-19 - Final Report. *N Engl J*  
656 *Med.* 2020; **383**, 1813–1826.  
657

- 658 19 RECOVERY Collaborative Group, Horby P, Lim WS, Emberson JR, Mafham M, Bell JL, Linsell L,  
659 Staplin N, Brightling C, Ustianowski A, Elmahi E, Prudon B, Green C, Felton T, Chadwick D, Rege K,  
660 Fegan C, Chappell LC, Faust SN, Jaki T, Jeffery K, Montgomery A, Rowan K, Juszczak E, Baillie JK,  
661 Haynes R, Landray MJ. Dexamethasone in Hospitalized Patients with Covid-19. 2021; *N Engl J Med.*  
662 **384**, 693–704.  
663
- 664 20 Kalil AC, Patterson TF, Mehta AK, Tomashek KM, Wolfe CR, Ghazaryan V, Marconi VC,  
665 Ruiz-Palacios GM, Hsieh L, Kline S, Tapson V, Iovine NM, Jain MK, Sweeney DA, El Sahly HM,  
666 Branche AR, Regalado Pineda J, Lye DC, Sandkovsky U, Luetkemeyer AF, Cohen SH, Finberg RW,  
667 Jackson PEH, Taiwo B, Paules CI, Arguinchona H, Erdmann N, Ahuja N, Frank M, Oh MD, Kim ES,  
668 Tan SY, Mularski RA, Nielsen H, Ponce PO, Taylor BS, Larson L, Roupheal NG, Saklawi Y, Cantos  
669 VD, Ko ER, Engemann JJ, Amin AN, Watanabe M, Billings J, Elie MC, Davey RT, Burgess TH,  
670 Ferreira J, Green M, Makowski M, Cardoso A, de Bono S, Bonnett T, Proschan M, Deye GA,  
671 Dempsey W, Nayak SU, Dodd LE, Beigel JH, ACTT-2 Study Group Members. Baricitinib plus  
672 Remdesivir for Hospitalized Adults with Covid-19. *N Engl J Med.* 2021; **384**, 795–807.  
673
- 674 21 Mehta P, McAuley DF, Brown M, Sanchez E, Tattersall RS, Manson JJ, HLH Across Speciality  
675 Collaboration, UK. COVID-19: consider cytokine storm syndromes and immunosuppression. *Lancet.*  
676 2020; **395**, 1033–1034.  
677
- 678 22 Stone JH, Frigault MJ, Serling-Boyd NJ, Fernandes AD, Harvey L, Foulkes AS, Horick NK, Healy  
679 BC, Shah R, Bensaci AM, Woolley AE, Nikiforow S, Lin N, Sagar M, Schragger H, Huckins DS,  
680 Axelrod M, Pincus MD, Fleisher J, Sacks CA, Dougan M, North CM, Halvorsen YD, Thurber TK,  
681 Dagher Z, Scherer A, Wallwork RS, Kim AY, Schoenfeld S, Sen P, Neilan TG, Perugino CA,  
682 Unizony SH, Collier DS, Matza MA, Vinh JM, Bowman KA, Meyerowitz E, Zafar A, Drobni ZD,  
683 Bolster MB, Kohler M, D'Silva KM, Dau J, Lockwood MM, Cubbison C, Weber BN, Mansour MK,  
684 BACC Bay Tocilizumab Trial Investigators. Efficacy of Tocilizumab in Patients Hospitalized with  
685 Covid-19. *N Engl J Med.* 2020; **383**, 2333–2344.  
686
- 687 23 Wang Y, Zhang D, Du G, Du R, Zhao J, Jin Y, Fu S, Gao L, Cheng Z, Lu Q, Hu Y, Luo G, Wang K,  
688 Lu Y, Li H, Wang S, Ruan S, Yang C, Mei C, Wang Y, Ding D, Wu F, Tang X, Ye X, Ye Y, Liu B,  
689 Yang J, Yin W, Wang A, Fan G, Zhou F, Liu Z, Gu X, Xu J, Shang L, Zhang Y, Cao L, Guo T, Wan  
690 Y, Qin H, Jiang Y, Jaki T, Hayden FG, Horby PW, Cao B, Wang C. Remdesivir in adults with  
691 severe COVID-19: a randomised, double-blind, placebo-controlled, multicentre trial. *Lancet.* 2020;  
692 **395**, 1569–1578.  
693
- 694 24 Carter PJ, Lazar GA. Next generation antibody drugs: pursuit of the 'high-hanging fruit'. *Nat Rev Drug*  
695 *Discov.* 2018; **17**, 197–223.  
696
- 697 25 Piechotta V, Iannizzi C, Chai KL, Valk SJ, Kimber C, Dorando E, Monsef I, Wood EMLamikanra AA,  
698 Roberts DJ, McQuilten Z, So-Osman C, Estcourt LJ, Skoetz N. Convalescent plasma or hyperimmune  
699 immunoglobulin for people with COVID-19: a living systematic review. *Cochrane Database Syst Rev.*  
700 2021; **5**, CD013600.  
701
- 702 26 Salazar E, Christensen PA, Graviss EA, Nguyen DT, Castillo B, Chen J, Lopez BV, Eagar TN, Yi X,  
703 Zhao P, Rogers J, Shehabeldin A, Joseph D, Masud F, Leveque C, Olsen RJ, Bernard DW, Gollihar J,  
704 Musser JM. Significantly Decreased Mortality in a Large Cohort of Coronavirus Disease 2019  
705 (COVID-19) Patients Transfused Early with Convalescent Plasma Containing High-Titer Anti-Severe  
706 Acute Respiratory Syndrome Coronavirus 2 (SARS-CoV-2) Spike Protein IgG. *Am J Pathol.* 2021;  
707 **191**, 90–107.

708

709 27 Libster R, Pérez Marc G, Wappner D, Coviello S, Bianchi A, Braem V, Esteban I, Caballero MT,  
710 Wood C, Berrueta M, Rondan A, Lescano G, Cruz P, Ritou Y, Fernández Viña V, Álvarez Paggi D,  
711 Esperante S, Ferreti A, Ofman G, Ciganda Á, Rodríguez R, Lantos J, Valentini R, Itcovici N, Hintze A,  
712 Oyarvide ML, Etchegaray C, Neira A, Name I, Alfonso J, López Castelo R, Caruso G, Rapelius S,  
713 Alvez F, Etchenique F, Dimase F, Alvarez D, Aranda SS, Sánchez Yanotti C, De Luca J, Jares Baglivo  
714 S, Laudanno S, Nowogrodzki F, Larrea R, Silveyra M, Leberzstein G, Debonis A, Molinos J, González  
715 M, Perez E, Kreplak N, Pastor Argüello S, Gibbons L, Althabe F, Bergel E, Polack FP, Fundación  
716 INFANT-COVID-19 Group. Early High-Titer Plasma Therapy to Prevent Severe Covid-19 in Older  
717 Adults. *N Engl J Med*. 2021; **384**, 610–618.

718

719 28 Imai M, Iwatsuki-Horimoto K, Hatta M, Loeber S, Halfmann PJ, Nakajima N, Watanabe T, Ujie M,  
720 Takahashi K, Ito M, Yamada S, Fan S, Chiba S, Kuroda M, Guan L, Takada K, Armbrust T, Balogh A,  
721 Furusawa Y, Okuda M, Ueki H, Yasuhara A, Sakai-Tagawa Y, Lopes TJS, Kiso M, Yamayoshi S,  
722 Kinoshita N, Ohmagari N, Hattori SI, Takeda M, Mitsuya H, Krammer F, Suzuki T, Kawaoka Y.  
723 Syrian hamsters as a small animal model for SARS-CoV-2 infection and countermeasure development.  
724 *Proc Natl Acad Sci U S A*. 2020; **117**, 16587–16595.

725

726 29 Hattori SI, Higashi-Kuwata N, Hayashi H, Allu SR, Raghavaiah J, Bulut H, Das D, Anson BJ, Lendy  
727 EK, Takamatsu Y, Takamune N, Kishimoto N, Murayama K, Hasegawa K, Li M, Davis DA, Kodama  
728 EN, Yarchoan R, Wlodawer A, Misumi S, Mesecar AD, Ghosh AK, Mitsuya H. A small molecule  
729 compound with an indole moiety inhibits the main protease of SARS-CoV-2 and blocks virus  
730 replication. *Nat Commun*. 2021; **12**, 668.

731

732 30 Maeda K, Higashi-Kuwata N, Kinoshita N, Kutsuna S, Tsuchiya K, Hattori SI, Matsuda K, Takamatsu  
733 Y, Gatanaga H, Oka S, Sugiyama H, Ohmagari N, Mitsuya H. Neutralization of SARS-CoV-2 with  
734 IgG from COVID-19-convalescent plasma. *Sci Rep*. 2021; **11**, 5563.

735

736 31 Hattori SI, Higashi-Kuwata N, Raghavaiah J, Das D, Bulut H, Davis DA, Takamatsu Y, Matsuda K,  
737 Takamune N, Kishimoto N, Okamura T, Misumi S, Yarchoan R, Maeda K, Ghosh AK, Mitsuya H.  
738 GRL-0920, an Indole Chloropyridinyl Ester, Completely Blocks SARS-CoV-2 Infection. *mBio*.  
739 2020; **11**, e01833-20.

740

741 32 Draper NR, Smith H. Applied regression analysis. John Wiley & Sons, New York, 1966.

742

743 33 Grifoni A, Weiskopf D, Ramirez SI, Mateus J, Dan JM, Moderbacher CR, Rawlings SA, Sutherland A,  
744 Premkumar L, Jadi RS, Marrama D, de Silva AM, Frazier A, Carlin AF, Greenbaum JA, Peters B,  
745 Krammer F, Smith DM, Crotty S, Sette A. Targets of T Cell Responses to SARS-CoV-2 Coronavirus  
746 in Humans with COVID-19 Disease and Unexposed Individuals. *Cell*. 2020; **181**, 1489–1501.

747

748 34 Dan JM, Mateus J, Kato Y, Hastie KM, Yu ED, Faliti CE, Grifoni A, Ramirez SI, Haupt S, Frazier A,  
749 Nakao C, Rayaprolu V, Rawlings SA, Peters B, Krammer F, Simon V, Saphire EO, Smith DM,  
750 Weiskopf D, Sette A, Crotty S. Immunological memory to SARS-CoV-2 assessed for up to 8 months  
751 after infection. *Science*. 2021; **371**, eabf4063.

752

753 35 Kristiansen PA, Page M, Bernasconi V, Mattiuzzo G, Dull P, Makar K, Plotkin S, Knezevic I. WHO  
754 International Standard for anti-SARS-CoV-2 immunoglobulin. *Lancet*. 2021; **397**, 1347–1348.

755

756 36 Noy-Porat T, Makdasi E, Alcalay R, Mechaly A, Levy Y, Bercovich-Kinori A, Zauberman A, Tamir  
757 H, Yahalom-Ronen Y, Israeli M, Epstein E, Achdout H, Melamed S, Chitlaru T, Weiss S, Peretz E,

- 758 Rosen O, Paran N, Yitzhaki S, Shapira SC, Israely T, Mazor O, Rosenfeld R. A panel of human  
759 neutralizing mAbs targeting SARS-CoV-2 spike at multiple epitopes. *Nat Commun.* 2020; **11**, 4303  
760
- 761 37 Rodda LB, Netland J, Shehata L, Pruner KB, Morawski PA, Thouvenel CD, Takehara KK,  
762 Eggenberger J, Hemann EA, Waterman HR, Fahning ML, Chen Y, Hale M, Rathe J, Stokes C, Wrenn  
763 S, Fiala B, Carter L, Hamerman JA, King NP, Gale M Jr, Campbell DJ, Rawlings DJ, Pepper M.  
764 Functional SARS-CoV-2-Specific Immune Memory Persists after Mild COVID-19. *Cell.* 2021; **184**,  
765 169–183.  
766
- 767 38 Baric RS. Emergence of a Highly Fit SARS-CoV-2 Variant. *N Engl J Med.* 2020; **383**, 2684–2686.  
768
- 769 39 Frampton D, Rampling T, Cross A, Bailey H, Heaney J, Byott M, Scott R, Sconza R, Price J,  
770 Margaritis M, Bergstrom M, Spyer MJ, Miralhes PB, Grant P, Kirk S, Valerio C, Mangera Z,  
771 Prabhakar T, Moreno-Cuesta J, Arulkumaran N, Singer M, Shin GY, Sanchez E, Paraskevopoulou  
772 SM, Pillay D, McKendry RA, Mirfenderesky M, Houlihan CF, Nastouli E. Genomic characteristics  
773 and clinical effect of the emergent SARS-CoV-2 B.1.1.7 lineage in London, UK: a whole-genome  
774 sequencing and hospital-based cohort study. *Lancet Infect Dis.* 2021; S1473-3099(21)00170-5. doi:  
775 10.1016/S1473-3099(21)00170-5. Online ahead of print.  
776
- 777 40 Tegally H, Wilkinson E, Giovanetti M, Iranzadeh A, Fonseca V, Giandhari J, Doolabh D, Pillay S,  
778 San EJ, Msomi N, Mlisana K, von Gottberg A, Walaza S, Allam M, Ismail A, Mohale T, Glass AJ,  
779 Engelbrecht S, Van Zyl G, Preiser W, Petruccione F, Sigal A, Hardie D, Marais G, Hsiao NY,  
780 Korsman S, Davies MA, Tyers L, Mudau I, York D, Maslo C, Goedhals D, Abrahams S,  
781 Laguda-Akingba O, Alisoltani-Dehkordi A, Godzik A, Wibmer CK, Sewell BT, Lourenço J,  
782 Alcantara LCJ, Kosakovsky Pond SL, Weaver S, Martin D, Lessells RJ, Bhiman JN, Williamson C,  
783 de Oliveira T. Detection of a SARS-CoV-2 variant of concern in South Africa. *Nature.* 2021; **592**,  
784 438–443.  
785
- 786 41 Faria NR, Mellan TA, Whittaker C, Claro IM, Candido DDS, Mishra S, Crispim MAE, Sales FCS,  
787 Hawryluk I, McCrone JT, Hulswit RJG, Franco LAM, Ramundo MS, de Jesus JG, Andrade PS,  
788 Coletti TM, Ferreira GM, Silva CAM, Manuli ER, Pereira RHM, Peixoto PS, Kraemer MUG,  
789 Gaburo N Jr, Camilo CDC, Hoeltgebaum H, Souza WM, Rocha EC, de Souza LM, de Pinho MC,  
790 Araujo LJT, Malta FSV, de Lima AB, Silva JDP, Zauli DAG, Ferreira ACS, Schnekenberg RP,  
791 Laydon DJ, Walker PGT, Schlüter HM, Dos Santos ALP, Vidal MS, Del Caro VS, Filho RMF, Dos  
792 Santos HM, Aguiar RS, Proença-Modena JL, Nelson B, Hay JA, Monod M, Miscouridou X,  
793 Coupland H, Sonabend R, Vollmer M, Gandy A, Prete CA Jr, Nascimento VH, Suchard MA,  
794 Bowden TA, Pond SLK, Wu CH, Ratmann O, Ferguson NM, Dye C, Loman NJ, Lemey P, Rambaut  
795 A, Fraiji NA, Carvalho MDPSS, Pybus OG, Flaxman S, Bhatt S, Sabino EC. Genomics and  
796 epidemiology of the P.1 SARS-CoV-2 lineage in Manaus, Brazil. *Science.* 2021; **372**, 815–821.  
797
- 798 42 Shen X, Tang H, Pajon R, Smith G, Glenn GM, Shi W, Korber B, Montefiori DC. Neutralization of  
799 SARS-CoV-2 Variants B.1.429 and B.1.351. *N Engl J Med.* 2021; NEJMc2103740. doi:  
800 10.1056/NEJMc2103740. Online ahead of print.  
801
- 802 43 Zhou B, Thao TTN, Hoffmann D, Taddeo A, Ebert N, Labroussaa F, Pohlmann A, King J, Steiner S,  
803 Kelly JN, Portmann J, Halwe NJ, Ulrich L, Trüeb BS, Fan X, Hoffmann B, Wang L, Thomann L,  
804 Lin X, Stalder H, Pozzi B, de Brot S, Jiang N, Cui D, Hossain J, Wilson MM, Keller MW, Stark TJ,  
805 Barnes JR, Dijkman R, Jores J, Benarafa C, Wentworth DE, Thiel V, Beer M. SARS-CoV-2 spike  
806 D614G change enhances replication and transmission. *Nature.* 2021; **592**, 122–127.

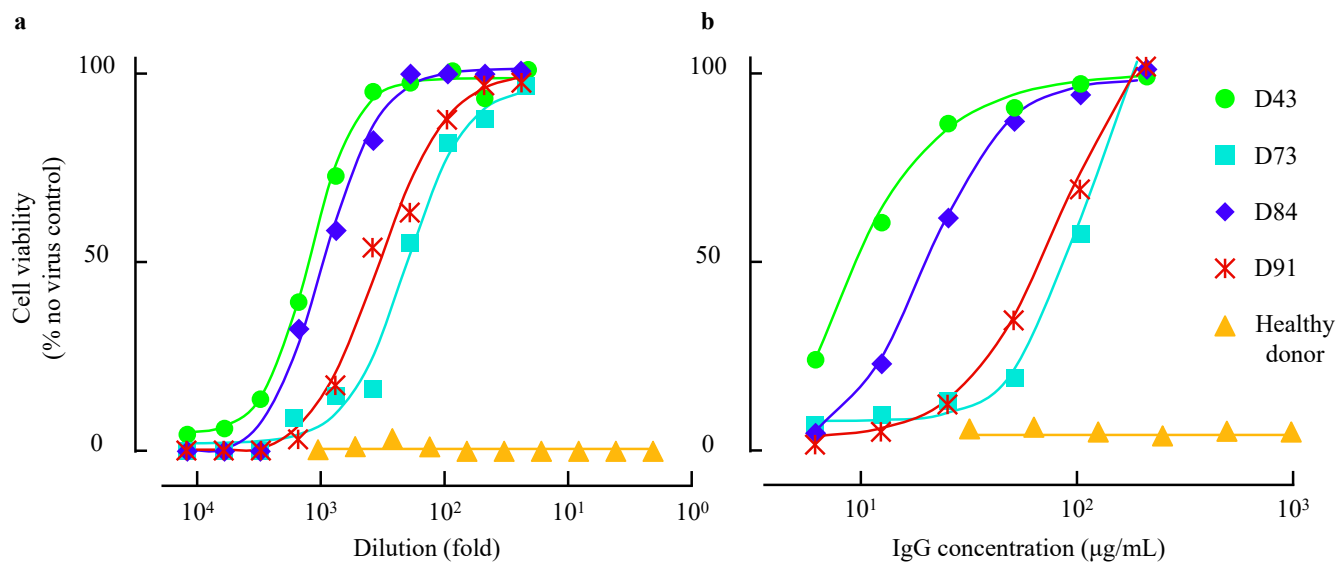

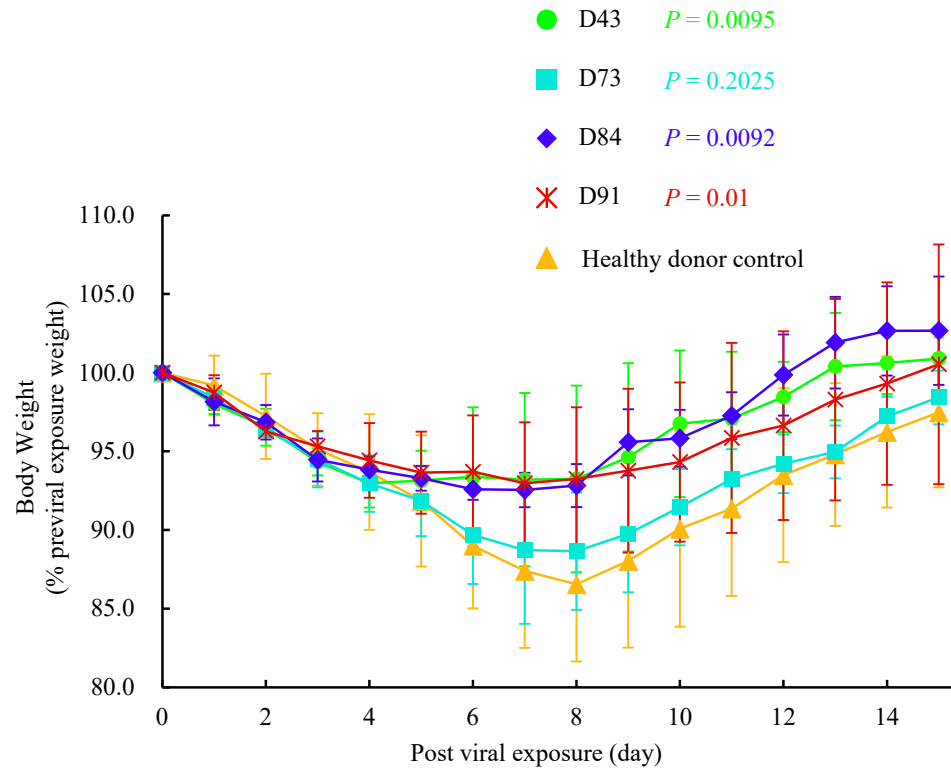

**a**

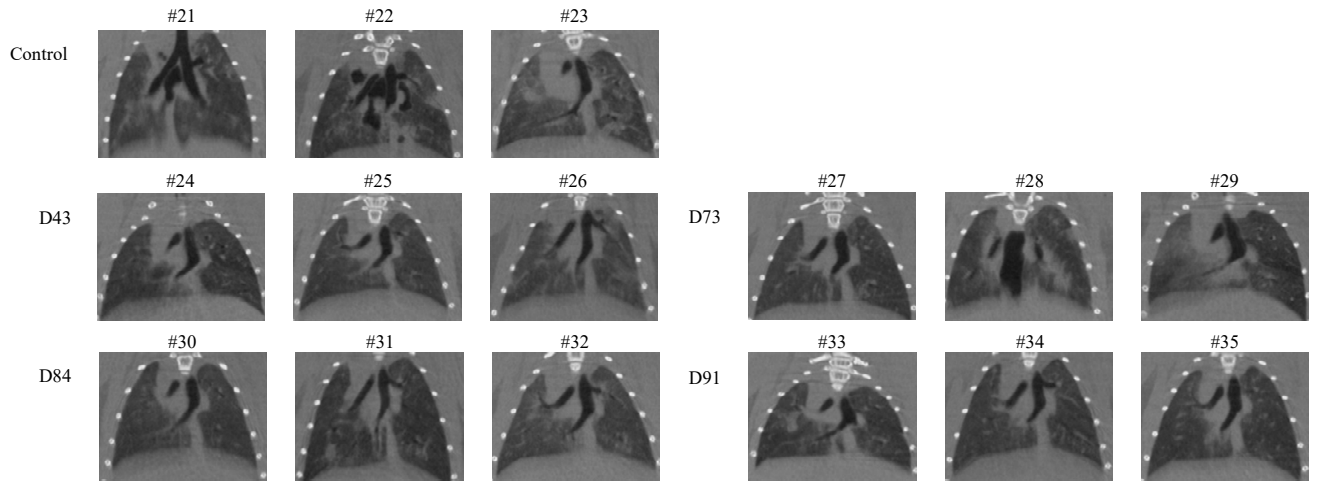

**b**

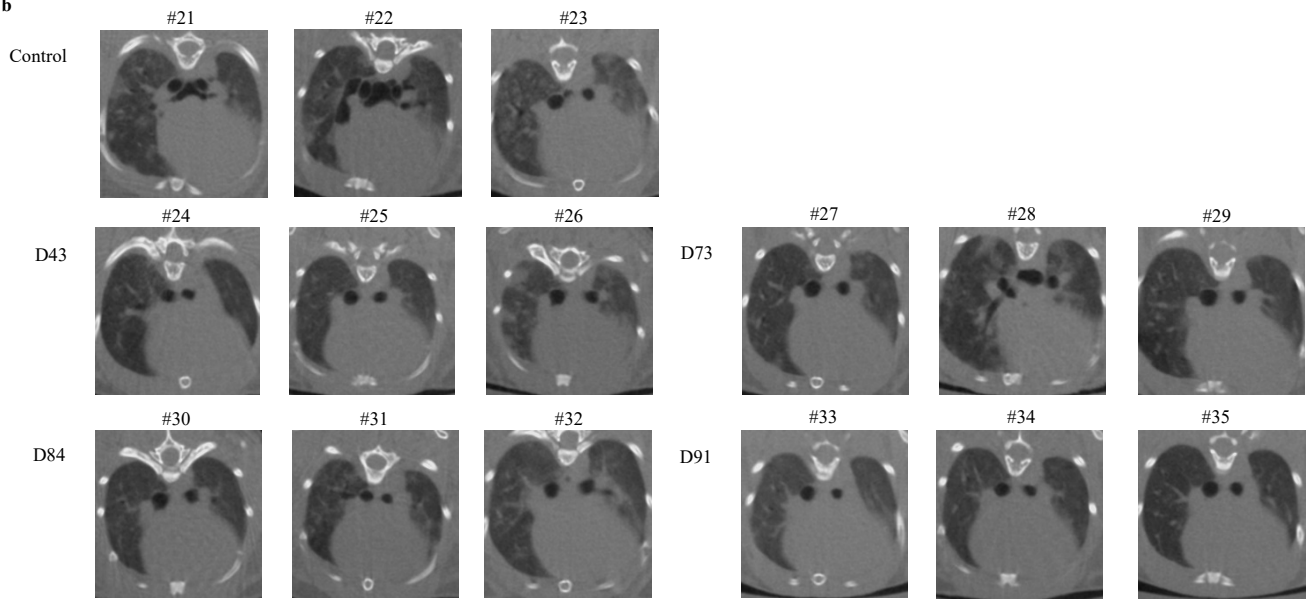



HE

IHC

Cont.

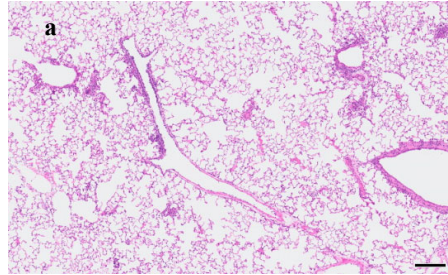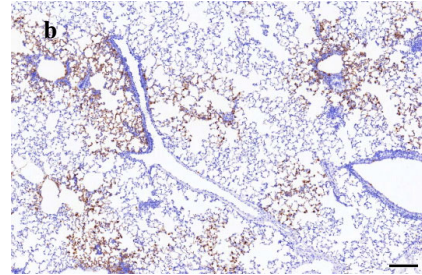

D43

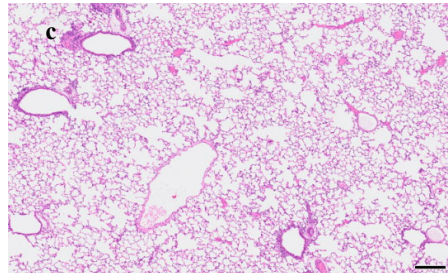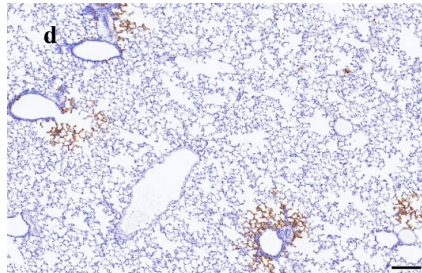

D73

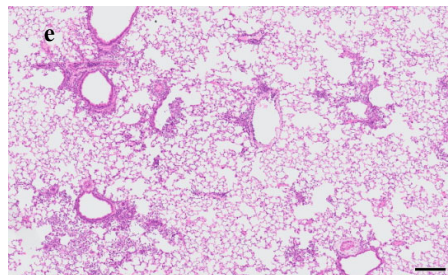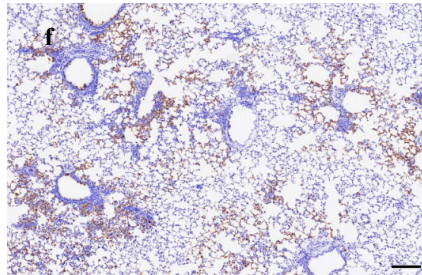

D84

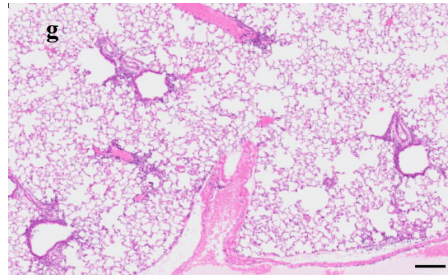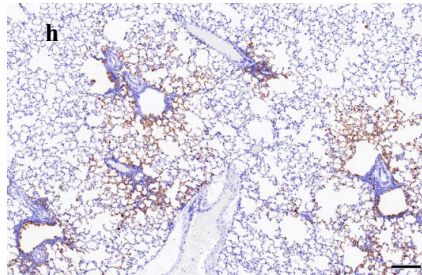

D91

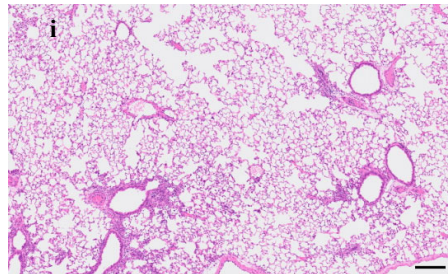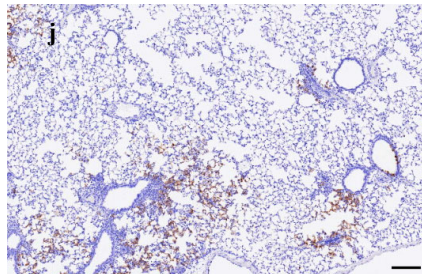

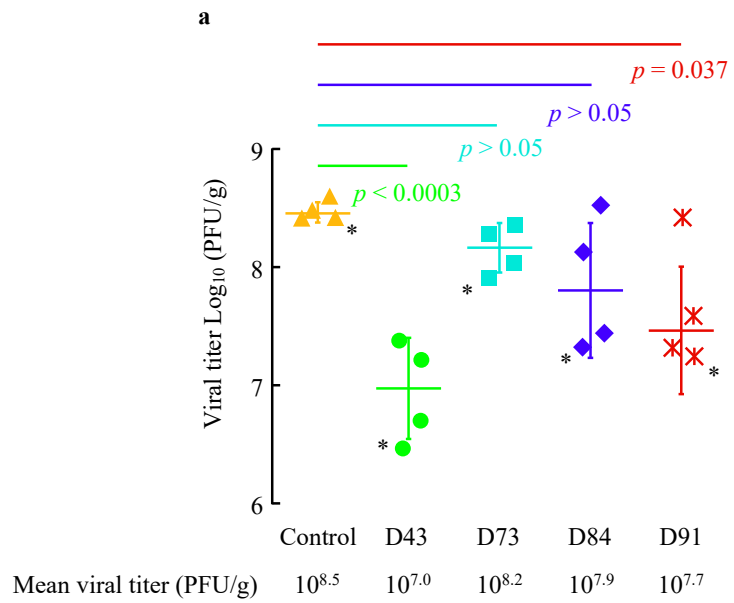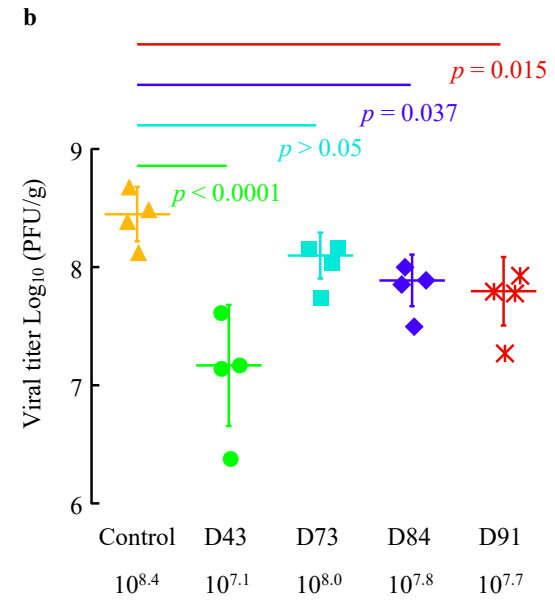

**a**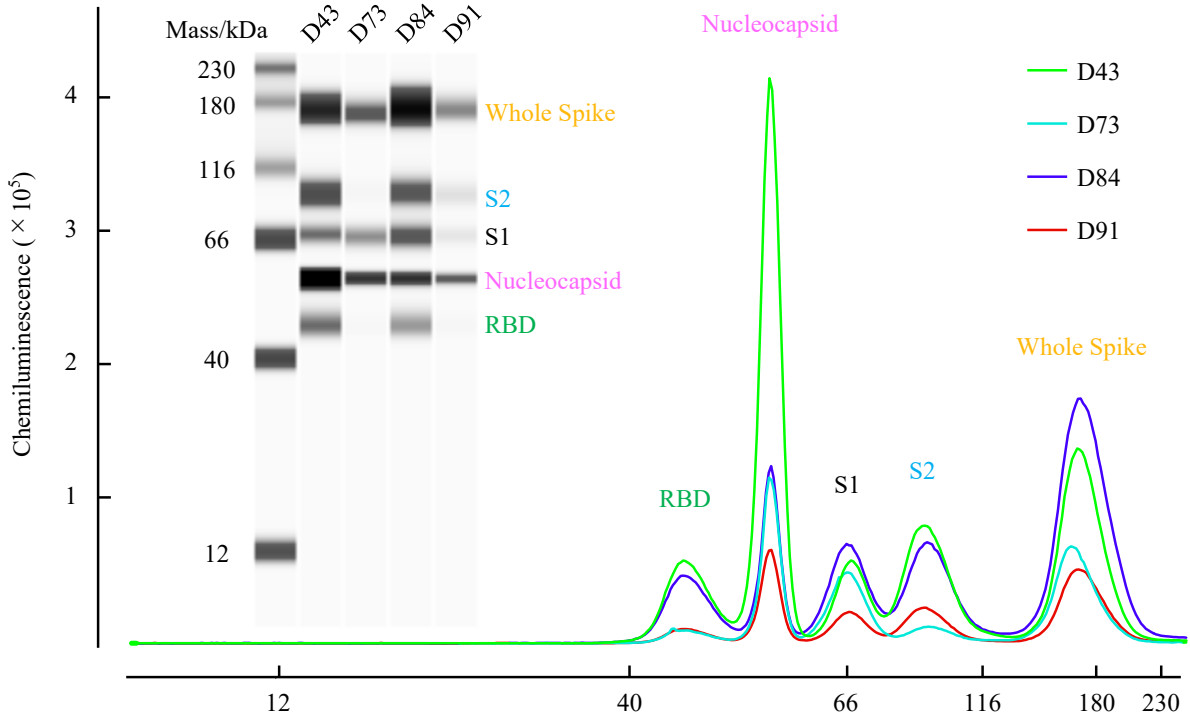**b**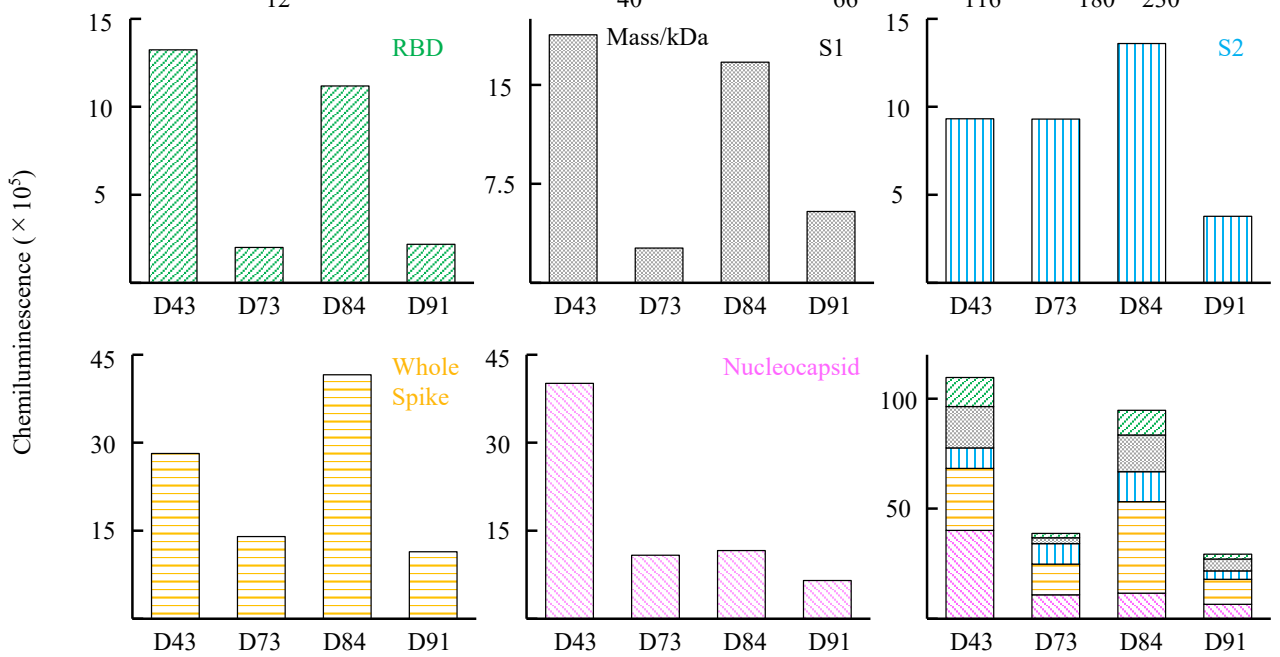

Source: http://biorxiv.org/content/10.1101/2021.06.29.450453v1.full.pdf
